# Supplementary material for: Novel Translational Read-through–Inducing Drugs as a Therapeutic Option for Shwachman-Diamond Syndrome
Source: MDPI journal article supplement (doi:10.3390/biomedicines10040886), 2022-04-12
Supplement: s1 [file s1]

## Supplementary material

**Table S1. Genetics and clinical features of SDS patients enrolled in this study.**

| UPN | Gender | Age | Genotype              | PMN<br>(Cell/mm <sup>3</sup> ) | Phenotype                                                                                                | Cytogenetics    |
|-----|--------|-----|-----------------------|--------------------------------|----------------------------------------------------------------------------------------------------------|-----------------|
| 20  | M      | 46  | 258+2T>C/183-184TA>CT | 500                            | PI, FTT, bone malformation, thrombocytopenia                                                             | 46,XY, del(20)q |
| 26  | M      | 16  | 258+2T>C/183-184TA>CT | 58                             | PI, FTT, bone malformation, thrombocytopenia                                                             | 46,XY           |
| 37  | F      | 10  | 258+2T>C/183-184TA>CT | 1280                           | PI, FTT, recurrent infections                                                                            | 46,XX i(7)(q10) |
| 39  | M      | 41  | 258+2T>C/183-184TA>CT | 1300                           | PI, FTT, bone malformation, thrombocytopenia, cognitive impairment                                       | 46,XY           |
| 47  | M      | 12  | 258+2T>C/183-184TA>CT | 550                            | PI, FTT, recurrent infections, bone malformation, thrombocytopenia                                       | 46,XY           |
| 58  | M      | 12  | 258+2T>C/183-184TA>CT | 390                            | PI, FTT, HbF>2%, bone malformation, thrombocytopenia, anemia                                             | 46,XY           |
| 69  | F      | 8   | 258+2T>C/183-184TA>CT | 770                            | PI, FTT, HbF>2%, anemia, cognitive impairment                                                            | 46,XX           |
| 72  | M      | 28  | 258+2T>C/183-184TA>CT | 380                            | PI, FTT, recurrent infections, HbF>2%, bone malformation, thrombocytopenia, anemia, cognitive impairment | 46,XY           |
| 73  | F      | 7   | 258+2T>C/183-184TA>CT | 520                            | PI, FTT, HbF>2%, thrombocytopenia                                                                        | 46,XX           |
| 74  | M      | 9   | 258+2T>C/183-184TA>CT | 1430                           | PI, FTT, HbF>2%, cognitive impairment                                                                    | 46,XY           |
| 75  | F      | 7   | 258+2T>C/183-184TA>CT | 1000                           | PI, FTT, HbF>2%, bone malformation, thrombocytopenia, cognitive impairment                               | 46,XX           |
| 82  | M      | 8   | 258+2T>C/183-184TA>CT | 310                            | PI, FTT, recurrent infections, bone malformation, thrombocytopenia, anemia, cognitive impairment         | 46,XY           |
| 80  | M      | 7   | 258+2T>C/183-184TA>CT | 680                            | PI, FTT, recurrent infections, bone malformation, anemia, cognitive impairment                           | 46,XY           |
| 87  | M      | 18  | 258+2T>C/183-184TA>CT | 880                            | PI, FTT, recurrent infections, bone malformation, cognitive impairment                                   | 46,XY           |
| 106 | M      | 36  | 258+2T>C/183-184TA>CT | 1210                           | PI, FTT, bone malformation, anemia                                                                       | 46,XY           |
| 108 | M      | 17  | 258+2T>C/183-184TA>CT | 970                            | PS, FTT, bone malformation, anemia                                                                       | 46,XY           |

UPN, unique patient number; PI, pancreas insufficiency; PS, pancreas sufficiency; FTT, failure to thrive.
